# Supplementary material for: Clinical Perspectives on the Injectability of Cross-Linked Hyaluronic Acid Dermal Fillers: A Standardized Methodology for Commercial Product Benchmarking with Inter-Injector Assessments
Source: MDPI journal article supplement (doi:10.3390/gels10020101), 2024-01-26
Supplement: s1 [file s1]

# Supplementary Materials: Clinical Perspectives on the Injectability of Cross-Linked Hyaluronic Acid Dermal Fillers: A Standardized Methodology for Commercial Product Benchmarking with Inter-Injector Assessments

Patrick Micheels, Alexandre Porcello, Thierry Bezzola, Daniel Perrenoud, Pierre Quinodoz, Yogeshvar Kalia, Eric Allémann, Alexis Laurent and Olivier Jordan

## 1. Supplementary Figures

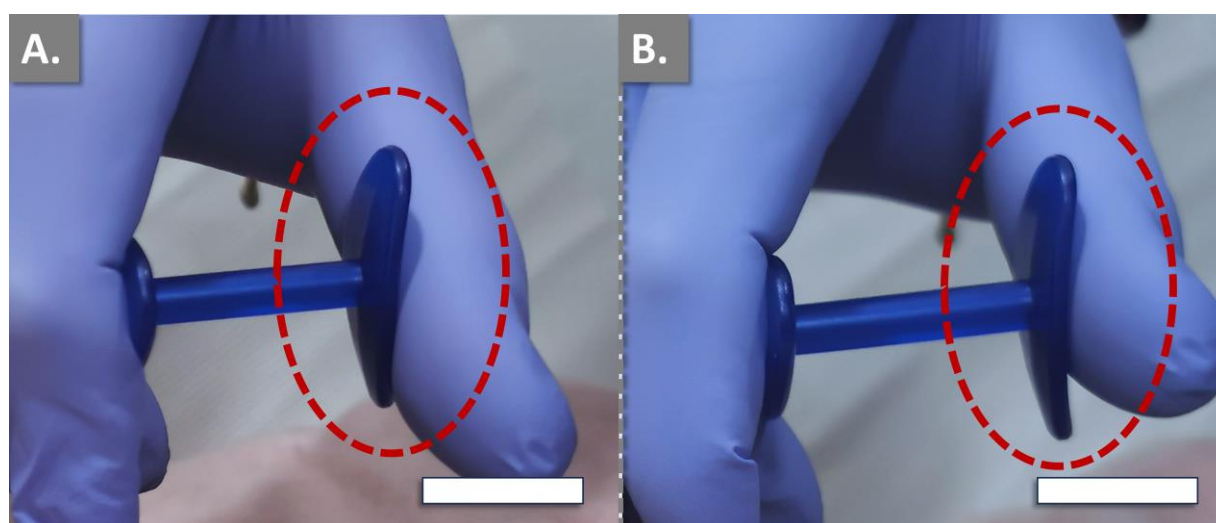

**Figure S1.** Illustration of different injector thumb positioning options on the plunger rod hilt of the syringe. (A) Depiction of an injection position using the P1-P2 joint of the thumb. (B) Depiction of an injection position using the pad or pulp of the thumb. Scale bars = 1.5 cm. Reproduced with permission, Patrick Micheels, private archives.

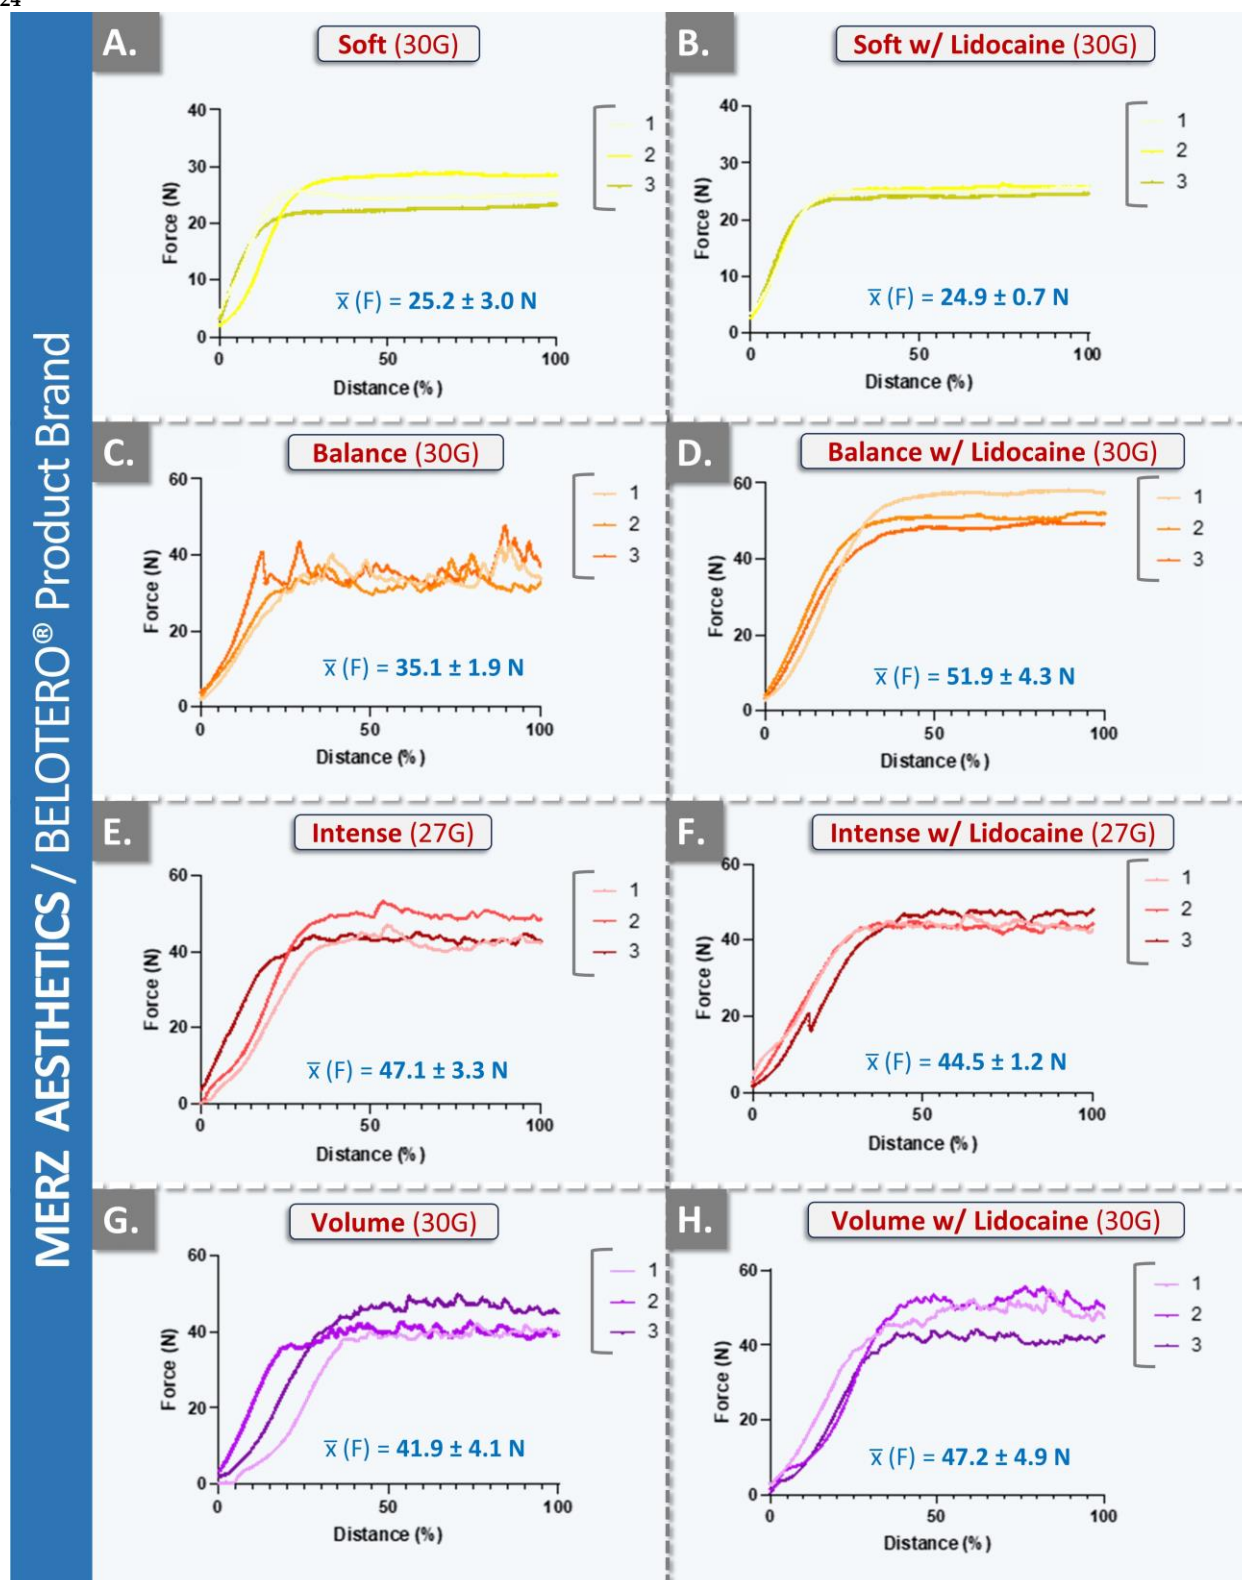

**Figure S2.** Force injection profiles of various Merz Aesthetics BELOTERO® products in an automated measurement setup, at a constant plunger rod actuation speed of  $1 \text{ mm} \cdot \text{s}^{-1}$ , which was conducted at room temperature. All measurements were performed in triplicate. Force injection profiles of the BELOTERO® Soft product (A), the BELOTERO® Soft product with lidocaine (B), the BELOTERO® Balance product (C), the BELOTERO® Balance product with lidocaine (D), the BELOTERO® Intense product (E), the BELOTERO® Intense product with lidocaine (F), the BELOTERO® Volume product (G), and the BELOTERO® Volume product with lidocaine (H). F, plateau force; G, gauge; N, Newtons.

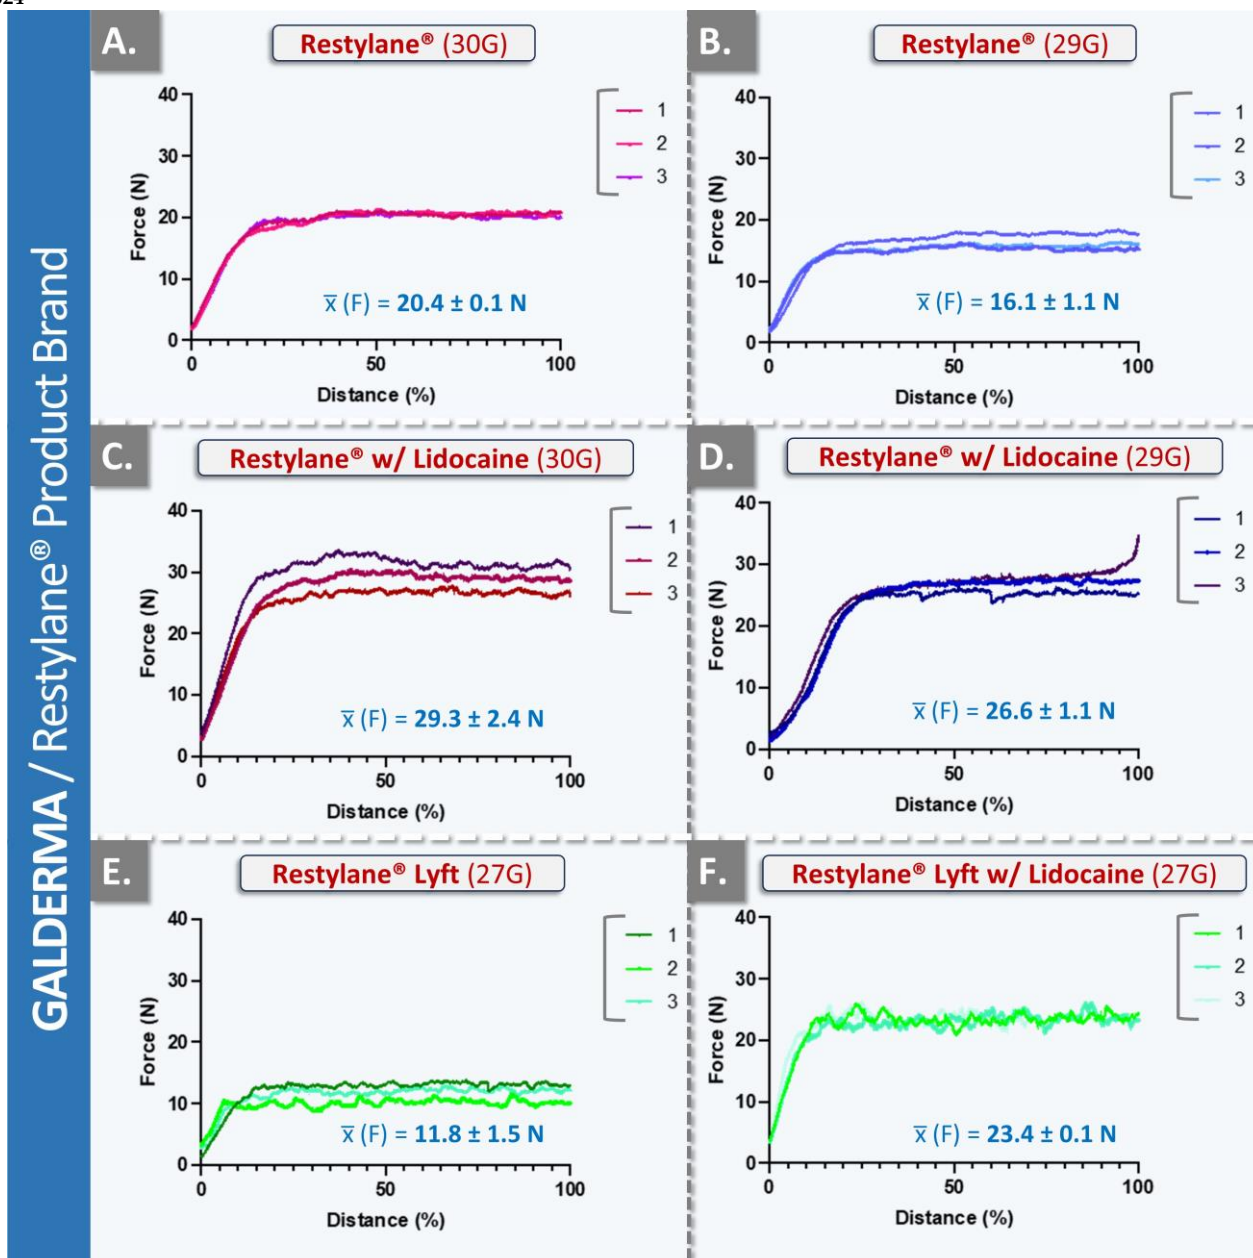

**Figure S3.** Force injection profiles of various Galderma Restylane® products in an automated measurement setup, at a constant plunger rod actuation speed of  $1 \text{ mm} \cdot \text{s}^{-1}$ , which was conducted at room temperature. All measurements were performed in triplicate. Force injection profiles of the Restylane® product (A,B), the Restylane® product with lidocaine (C,D), the Restylane® Lyft product (E), and the Restylane® Lyft product with lidocaine (F). F, plateau force; G, gauge; N, Newtons.

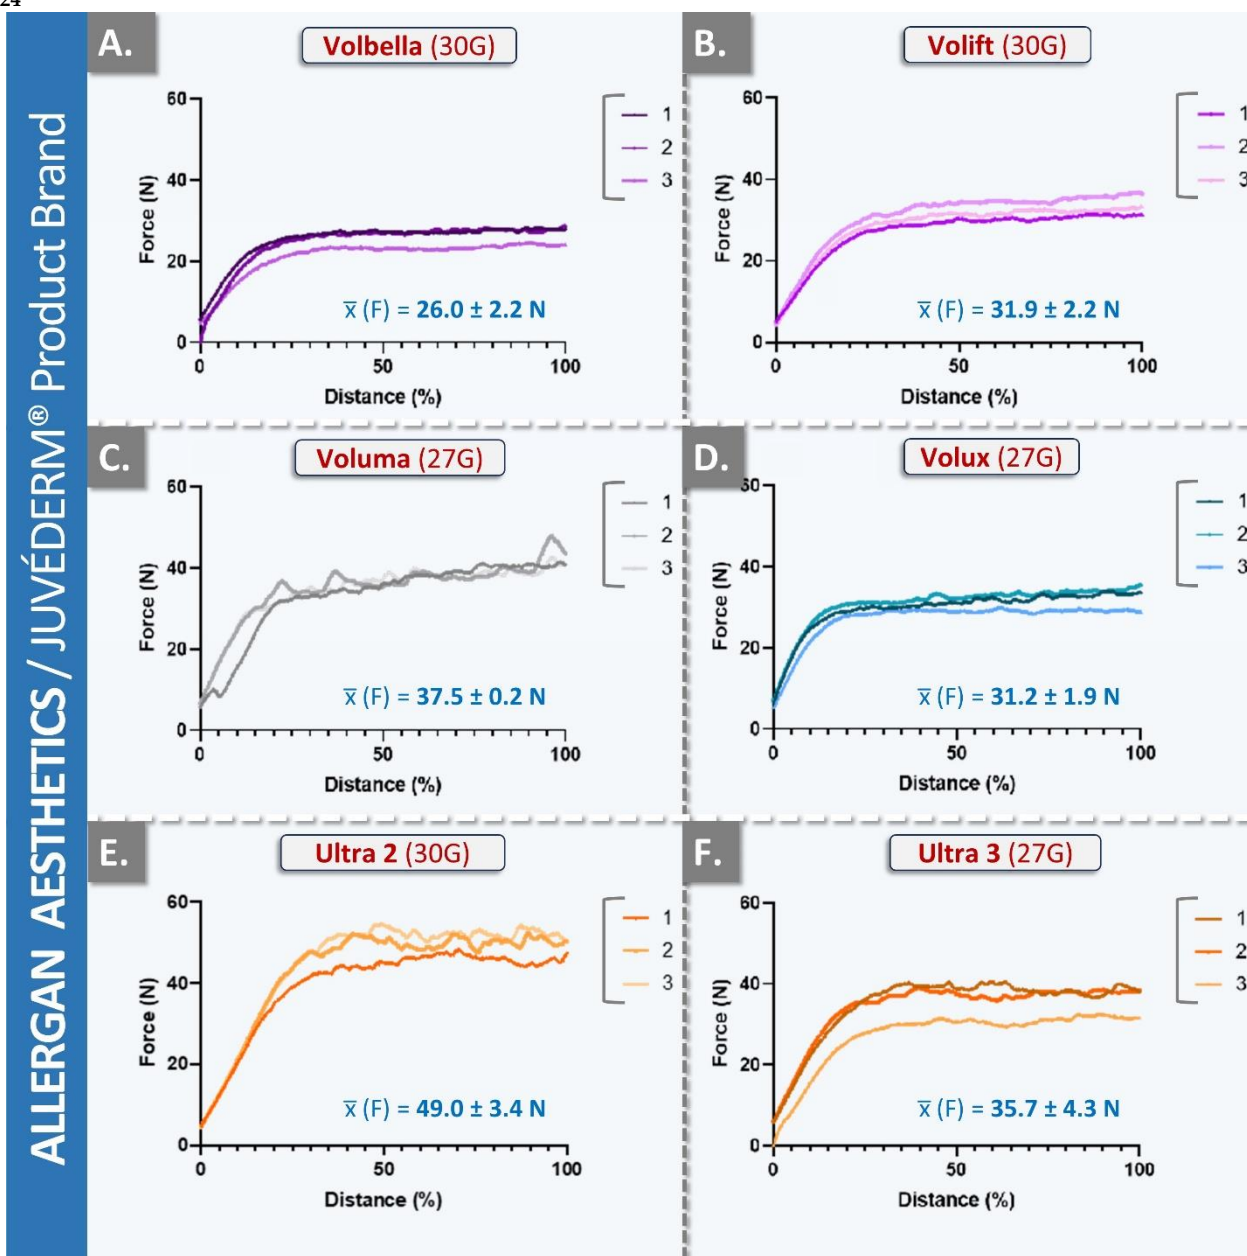

**Figure S4.** Force injection profiles of various Allergan Aesthetics JUVÉDERM® products in an automated measurement setup, at a constant plunger rod actuation speed of  $1 \text{ mm} \cdot \text{s}^{-1}$ , which was conducted at room temperature. All measurements were performed in triplicate. Force injection profiles of the JUVÉDERM® Volbella product (A), the JUVÉDERM® Volift product (B), the JUVÉDERM® Voluma product (C), the JUVÉDERM® Volux product (D), the JUVÉDERM® Ultra 2 product (E), and the JUVÉDERM® Ultra 3 product (F), plateau force; G, gauge; N, Newtons.



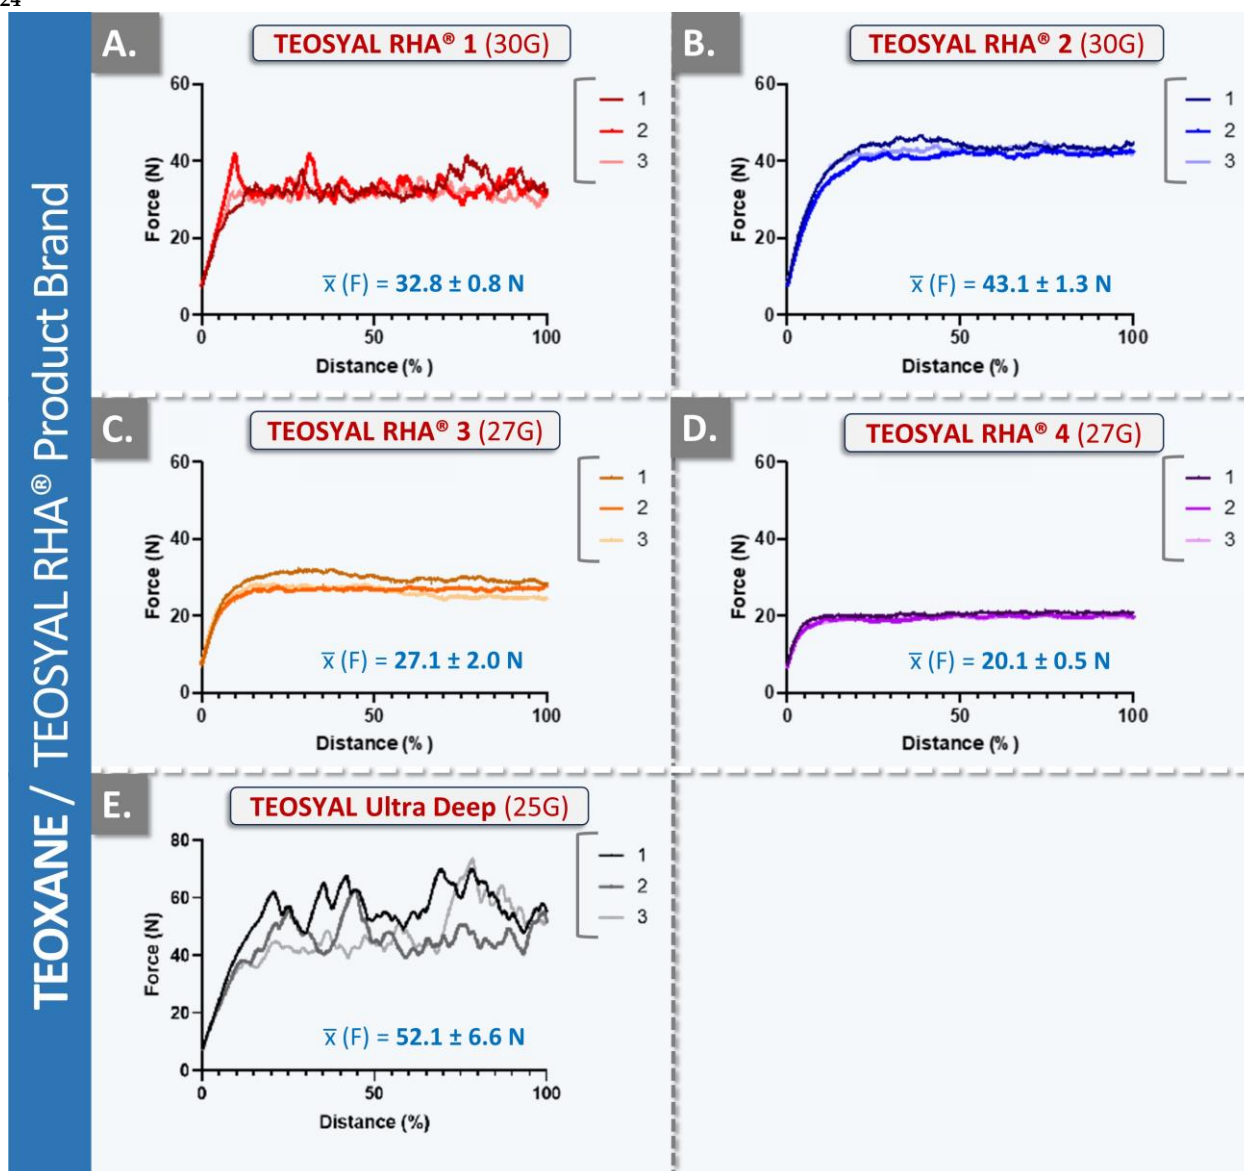

**Figure S5.** Force injection profiles of various TEOXANE TEOSYAL RHA® products in an automated measurement setup, at a constant plunger rod actuation speed of  $1 \text{ mm} \cdot \text{s}^{-1}$ , which was conducted at room temperature. All measurements were performed in triplicate. Force injection profiles of the TEOSYAL RHA® 1 product (A), the TEOSYAL RHA® 2 product (B), the TEOSYAL RHA® 3 product (C), the TEOSYAL RHA® 4 product (D), and the TEOSYAL Ultra Deep product (E). F, plateau force; G, gauge; N, Newtons.

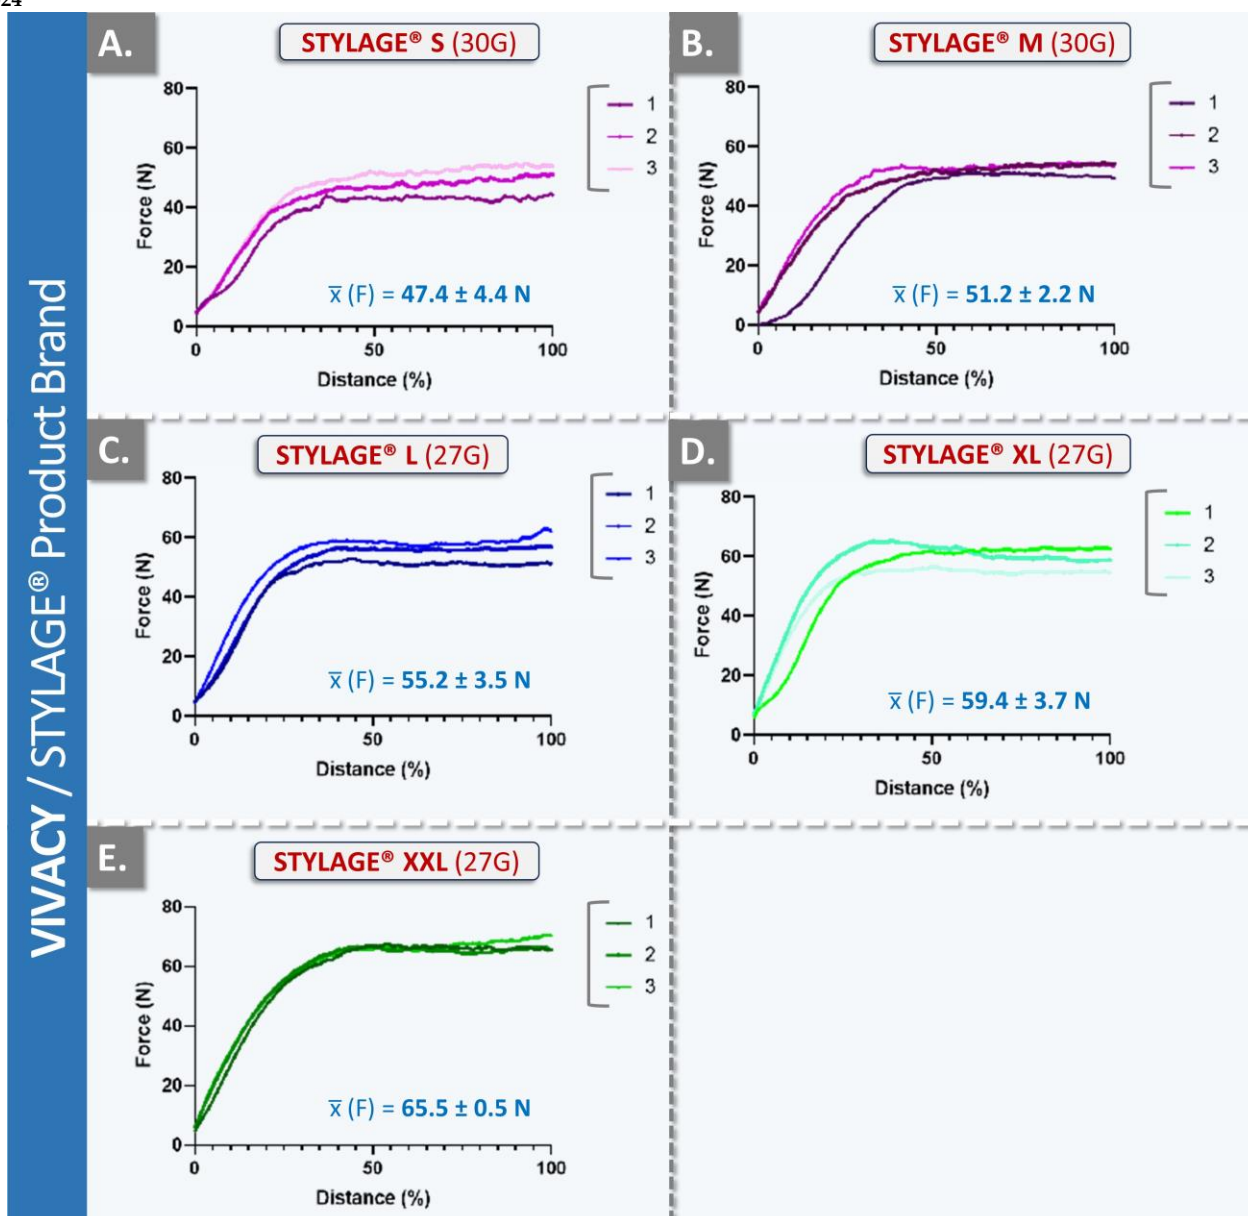

**Figure S6.** Force injection profiles of various Vivacy STYLAGE® products in an automated measurement setup, at a constant plunger rod actuation speed of  $1 \text{ mm} \cdot \text{s}^{-1}$ , which was conducted at room temperature. All measurements were performed in triplicate. Force injection profiles of the STYLAGE® S product (A), the STYLAGE® M product (B), the STYLAGE® L product (C), the STYLAGE® XL product (D), and the STYLAGE® XXL product (E). F, plateau force; G, gauge; N, Newtons.

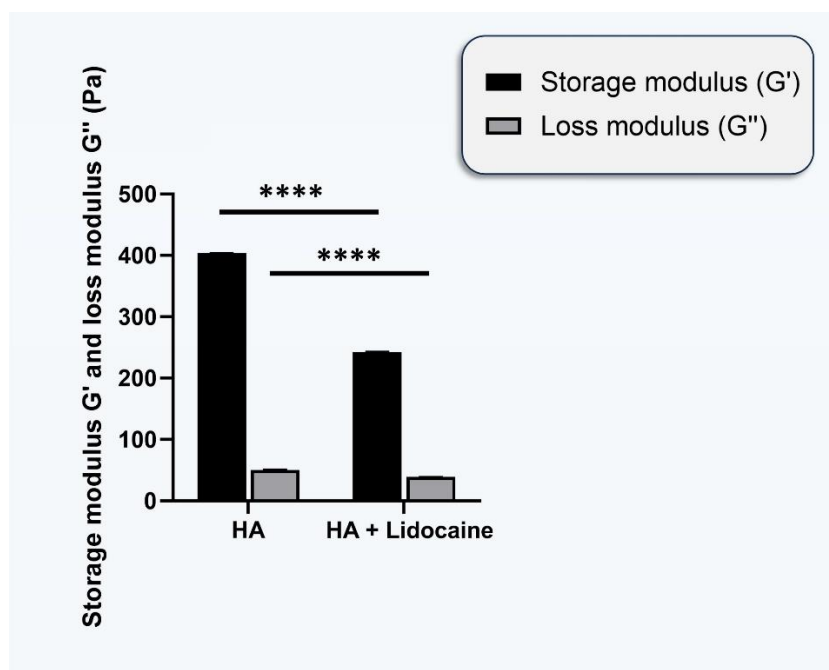

**Figure S7.** Results of experimental sterilization studies, for the assessment of the impact of lidocaine incorporation in cross-linked HA-based hydrogel systems. Post-sterilization rheological attributes of the hydrogel samples were determined and revealed significantly lower storage and loss moduli values in the samples containing lidocaine. Detailed results of the statistical analyses are presented in Table S10. HA, hyaluronic acid; Pa, Pascals.

## 2. Supplementary Tables

**Table S1.** Technical benchmarking of the investigated commercial dermal filler products in terms of physical, chemical, and rheological attributes. From the physical standpoint, all of the considered hydrogels are continuous systems with respective viscous and elastic components. From a chemical standpoint, the considered hydrogels are composed of covalently cross-linked polymeric networks, hydrated with injection-grade, osmotically controlled, and pH-controlled aqueous media. In case of presence of small molecule additives (e.g., mannitol, lidocaine), these are dissolved in the continuous phase of the hydrogel and may interact with the polymeric network via multiple chemical bonds and mechanisms (i.e., protective for mannitol, pro-degradant under specific conditions for lidocaine). BDDE, 1,4-butanediol diglycidyl ether; HA, hyaluronic acid; NA, non-applicable; RT, room temperature.

| Product Brand and Name | Cross-Linking Agent | Storage Modulus G' (Pa) | Loss Modulus G'' (Pa) | Tan $\delta$ | Frequency (Hz) | Temperature (°C) | References |
|------------------------|---------------------|-------------------------|-----------------------|--------------|----------------|------------------|------------|
| JUVÉDERM® VOLBELLA®    | BDDE                | 271                     | 39                    | 0.144        | 5              | RT               | [43]       |
| JUVÉDERM® VOLIFT®      | BDDE                | 340                     | 46                    | 0.135        | 5              | RT               | [43]       |
| JUVÉDERM® VOLUMA®      | BDDE                | 354                     | 38                    | 0.109        | 1              | 37               | [58]       |
| JUVÉDERM® VOLUX®       | BDDE                | 665                     | 49                    | 0.074        | 5              | RT               | [43]       |
| JUVÉDERM® Ultra 2      | BDDE                | 188                     | 75                    | 0.399        | 5              | RT               | [43]       |
| JUVÉDERM® Ultra 3      | BDDE                | 173                     | 37                    | 0.210        | 0.1            | 37               | [42]       |
| Restylane®             | BDDE                | 864                     | 185                   | 0.214        | 5              | RT               | [43]       |
| Restylane® Lido        | BDDE                | NA                      | NA                    | NA           | NA             | NA               | NA         |
| Restylane® Lyft        | BDDE                | 977                     | 198                   | 0.203        | 5              | RT               | [43]       |
| Restylane® Lyft Lido   | BDDE                | NA                      | NA                    | NA           | NA             | NA               | NA         |
| BELOTERO® Soft         | BDDE                | 7                       | 9                     | 1.270        | 0.1            | 37               | [42]       |
| BELOTERO® Soft +       | BDDE                | 40                      | 42                    | 1.050        | 5              | RT               | [43]       |
| BELOTERO® Balance      | BDDE                | 81                      | 64                    | 0.790        | 4.6            | 25               | [58]       |
| BELOTERO® Balance +    | BDDE                | 89                      | 63                    | 0.705        | 4.6            | 25               | [58]       |
| BELOTERO® Intense      | BDDE                | 76                      | 27                    | 0.350        | 0.1            | 37               | [42]       |
| BELOTERO® Intense +    | BDDE                | 255                     | 110                   | 0.431        | 5              | RT               | [43]       |
| BELOTERO® Volume       | BDDE                | 233                     | 54                    | 0.230        | 0.7            | 37               | [43]       |
| BELOTERO® Volume +     | BDDE                | 438                     | 103                   | 0.235        | 5              | NA               | [43]       |
| TEOSYAL RHA® 1         | BDDE                | 133                     | 54                    | 0.406        | 5              | RT               | [43]       |
| TEOSYAL RHA® 2         | BDDE                | 319                     | 99                    | 0.310        | 5              | RT               | [43]       |
| TEOSYAL RHA® 3         | BDDE                | 264                     | 67                    | 0.254        | 5              | RT               | [43]       |
| TEOSYAL RHA® 4         | BDDE                | 346                     | 62                    | 0.179        | 5              | RT               | [43]       |
| TEOSYAL Ultra Deep     | BDDE                | 348                     | 54                    | 0.155        | 5              | RT               | [43]       |
| STYLAGE® S             | BDDE                | 165                     | 31                    | 0.190        | 1              | 25               | [46]       |
| STYLAGE® M             | BDDE                | 195                     | 35                    | 0.180        | 1              | 25               | [46]       |
| STYLAGE® L             | BDDE                | 240                     | 41                    | 0.170        | 1              | 25               | [46]       |
| STYLAGE® XL            | BDDE                | 290                     | 46                    | 0.160        | 1              | 25               | [46]       |
| STYLAGE® XXL           | BDDE                | 290                     | 38                    | 0.130        | 1              | 25               | [46]       |



**Table S2.** Quantitative results of the post hoc Tukey’s multiple comparison test, in relation with the comparative injectability setup study (i.e., ex vivo human skin versus synthetic SimSkin® substrates) presented in Figure 1. Non-significant differences (i.e., corresponding to a  $p$ -value  $> 0.05$ ) were not listed. N, Newtons.

| Compared Parameters | Compared Groups / Injectors                     | Mean Absolute Difference (N) | Adjusted $p$ -Value | Statistical Significance Level <sup>1</sup> |
|---------------------|-------------------------------------------------|------------------------------|---------------------|---------------------------------------------|
| Mean Force          | Ex vivo – Injector 2 vs. SimSkin® – Injector 2  | 0.2767                       | 0.0330              | *                                           |
|                     | SimSkin® – Injector 1 vs. SimSkin® – Injector 2 | 0.2833                       | 0.0294              | *                                           |
| Peak Force          | Ex vivo – Injector 2 vs. SimSkin® – Injector 2  | 0.5667                       | 0.0462              | *                                           |

<sup>1</sup> A statistical significance level described by one asterisk “\*” corresponded to a  $p$ -value between 0.01 and 0.05.

**Table S3.** Quantitative results of the post hoc Tukey’s multiple comparison test, in relation with the comparative manual injectability data presented in Figure 2 and Figure 3. Each dermal filler product was statistically compared to all the other products of the same brand. Non-significant differences (i.e., corresponding to a  $p$ -value > 0.05) were not listed. DP, Daniel Perrenoud; G, gauge; L, lidocaine; PM, Patrick Micheels; TB, Thierry Bezzola.

| Injectors | Product Brands | Compared Products          | Mean Absolute Difference (N) | Adjusted $p$ -Value | Statistical Significance Level <sup>1</sup> |
|-----------|----------------|----------------------------|------------------------------|---------------------|---------------------------------------------|
| PM        | JUVÉDERM®      | VOLBELLA® vs. VOLIFT®      | −8.599                       | < 0.0001            | ****                                        |
|           |                | VOLBELLA® vs. Ultra 3      | −3.400                       | 0.0393              | *                                           |
|           |                | VOLIFT® vs. VOLUMA®        | 8.288                        | < 0.0001            | ****                                        |
|           |                | VOLIFT® vs. VOLUX®         | 6.262                        | 0.0004              | ***                                         |
|           |                | VOLIFT® vs. Ultra 3        | 5.199                        | 0.0018              | **                                          |
|           |                | VOLIFT® vs. Ultra 2        | 8.288                        | < 0.0001            | ****                                        |
|           | Restylane®     | 29G + L vs. 30G            | −1.658                       | 0.0002              | ***                                         |
|           |                | 29G vs. 30G + L            | −1.403                       | 0.0011              | **                                          |
|           |                | 29G vs. 30G                | −2.253                       | < 0.0001            | ****                                        |
|           |                | 30G + L vs. 30G            | −0.850                       | 0.0425              | *                                           |
|           |                | 30G + L vs. Lyft 27G       | 1.289                        | 0.0022              | **                                          |
|           |                | 30G vs. Lyft 27G + L       | 1.530                        | 0.0005              | ***                                         |
|           | BELOTERO®      | 30G vs. Lyft 27G           | 2.139                        | < 0.0001            | ****                                        |
|           |                | Soft + L vs. Balance + L   | −10.640                      | 0.0127              | *                                           |
|           |                | Soft vs. Balance + L       | −15.560                      | 0.0024              | **                                          |
|           |                | Soft vs. Balance           | −10.640                      | 0.0127              | *                                           |
|           |                | Balance + L vs. Intense    | 12.200                       | 0.0219              | *                                           |
|           |                | Balance + L vs. Volume + L | 11.100                       | 0.0088              | **                                          |
|           | TEOSYAL®       | Balance + L vs. Volume     | 16.020                       | 0.0017              | **                                          |
|           |                | Balance vs. Volume         | 11.100                       | 0.0088              | **                                          |
|           | STYLAGE®       | RHA® 1 vs. RHA® 3          | −1.955                       | 0.0031              | **                                          |
|           |                | RHA® 3 vs. RHA® 4          | 1.473                        | 0.0164              | *                                           |
|           |                | S vs. M                    | 2.451                        | 0.0122              | *                                           |
|           |                | S vs. L                    | 3.542                        | 0.0009              | ***                                         |
|           |                | S vs. XXL                  | 2.153                        | 0.0268              | *                                           |
|           |                | L vs. XL                   | −2.253                       | 0.0206              | *                                           |
| TB        | JUVÉDERM®      | VOLIFT® vs. VOLUX®         | 7.834                        | < 0.0001            | ****                                        |
|           |                | VOLIFT® vs. VOLBELLA®      | 7.296                        | < 0.0001            | ****                                        |
|           |                | VOLIFT® vs. VOLUMA®        | 9.095                        | < 0.0001            | ****                                        |
|           |                | VOLIFT® vs. Ultra 2        | 4.236                        | 0.0016              | **                                          |
|           |                | VOLUX® vs. Ultra 3         | −9.152                       | < 0.0001            | ****                                        |
|           |                | VOLUX® vs. Ultra 2         | −3.598                       | 0.0059              | **                                          |
|           |                | VOLBELLA® vs. Ultra 3      | −8.613                       | < 0.0001            | ****                                        |
|           |                | VOLBELLA® vs. Ultra 2      | −3.060                       | 0.0189              | *                                           |
|           |                | VOLUMA® vs. Ultra 3        | −10.410                      | < 0.0001            | ****                                        |
|           |                | VOLUMA® vs. Ultra 2        | −4.859                       | 0.0005              | ***                                         |
|           | Restylane®     | Ultra 3 vs. Ultra 2        | 5.553                        | 0.0001              | ***                                         |
|           |                | 29G + L vs. 29G            | 2.904                        | 0.0104              | *                                           |
|           |                | 29G + L vs. Lyft 27G + L   | 4.080                        | 0.0007              | ***                                         |
|           |                | 29G + L vs. Lyft 27G       | 4.009                        | 0.0008              | ***                                         |
|           |                | 29G vs. 30G + L            | −2.408                       | 0.0359              | *                                           |
|           |                | 29G vs. 30G                | −2.692                       | 0.0177              | *                                           |
|           |                | 30G + L vs. Lyft 27G + L   | 3.584                        | 0.0020              | **                                          |
|           |                | 30G + L vs. Lyft 27G       | 3.513                        | 0.0024              | **                                          |
|           |                | 30G vs. Lyft 27G + L       | 3.868                        | 0.0011              | **                                          |

|    |           |                             |         |          |      |
|----|-----------|-----------------------------|---------|----------|------|
|    |           | 30G vs. Lyft 27G            | 3.797   | 0.0012   | **   |
|    | BELOTERO® | Soft + L vs. Balance + L    | −5.667  | < 0.0001 | **** |
|    |           | Soft + L vs. Intense + L    | −3.046  | 0.0050   | **   |
|    |           | Soft + L vs. Intense        | −8.004  | < 0.0001 | **** |
|    |           | Soft + L vs. Volume + L     | −5.341  | < 0.0001 | **** |
|    |           | Soft vs. Balance + L        | −6.644  | < 0.0001 | **** |
|    |           | Soft vs. Balance            | −3.060  | 0.0048   | **   |
|    |           | Soft vs. Intense + L        | −4.023  | 0.0003   | ***  |
|    |           | Soft vs. Intense            | −8.982  | < 0.0001 | **** |
|    |           | Soft vs. Volume + L         | −6.318  | < 0.0001 | **** |
|    |           | Soft vs. Volume             | −2.267  | 0.0497   | *    |
|    |           | Balance + L vs. Balance     | 3.584   | 0.0010   | **   |
|    |           | Balance + L vs. Intense + L | 2.621   | 0.0177   | *    |
|    |           | Balance + L vs. Intense     | −2.338  | 0.0405   | *    |
|    |           | Balance + L vs. Volume      | 4.378   | 0.0001   | ***  |
|    |           | Balance vs. Intense         | −5.922  | < 0.0001 | **** |
|    |           | Balance vs. Volume + L      | −3.258  | 0.0027   | **   |
|    |           | Intense + L vs. Intense     | −4.958  | < 0.0001 | **** |
|    |           | Intense + L vs. Volume + L  | −2.295  | 0.0458   | *    |
|    |           | Intense vs. Volume + L      | 2.663   | 0.0156   | *    |
|    |           | Intense vs. Volume          | 6.715   | < 0.0001 | **** |
|    |           | Volume + L vs. Volume       | 4.052   | 0.0003   | ***  |
|    | TEOSYAL®  | RHA® 1 vs. RHA® 3           | 2.947   | 0.0033   | **   |
|    |           | RHA® 1 vs. RHA® 4           | 4.293   | 0.0003   | ***  |
|    |           | RHA® 2 vs. RHA® 3           | 2.848   | 0.0041   | **   |
|    |           | RHA® 2 vs. RHA® 4           | 4.193   | 0.0003   | ***  |
|    | STYLAGE®  | S vs. M                     | −7.834  | < 0.0001 | **** |
|    |           | S vs. XL                    | −3.457  | 0.0176   | *    |
|    |           | M vs. L                     | 7.423   | < 0.0001 | **** |
|    |           | M vs. XL                    | 4.378   | 0.0037   | **   |
|    |           | M vs. XXL                   | 6.063   | 0.0003   | ***  |
|    |           | L vs. XL                    | −3.046  | 0.0365   | *    |
| DP | JUVÉDERM® | VOLUX® vs. VOLUMA®          | −4.023  | 0.0149   | *    |
|    |           | VOLBELLA® vs. VOLUMA®       | −6.035  | 0.0006   | ***  |
|    |           | VOLUMA® vs. Ultra 3         | 6.007   | 0.0006   | ***  |
|    |           | VOLUMA® vs. Ultra 2         | 5.270   | 0.0019   | **   |
|    | BELOTERO® | Soft + L vs. Soft           | −7.820  | 0.0004   | ***  |
|    |           | Soft + L vs. Balance        | −7.069  | 0.0012   | **   |
|    |           | Soft + L vs. Intense + L    | −9.534  | < 0.0001 | **** |
|    |           | Soft + L vs. Volume + L     | −11.150 | < 0.0001 | **** |
|    |           | Soft + L vs. Volume         | −4.675  | 0.0417   | *    |
|    |           | Soft vs. Balance + L        | 6.191   | 0.0045   | **   |
|    |           | Soft vs. Intense            | 7.551   | 0.0006   | ***  |
|    |           | Balance + L vs. Balance     | −5.440  | 0.0136   | *    |
|    |           | Balance + L vs. Intense + L | −7.905  | 0.0004   | ***  |
|    |           | Balance + L vs. Volume + L  | −9.520  | < 0.0001 | **** |
|    |           | Balance vs. Intense         | 6.800   | 0.0018   | **   |
|    |           | Intense + L vs. Intense     | 9.265   | < 0.0001 | **** |
|    |           | Intense + L vs. Volume      | 4.859   | 0.0319   | *    |
|    |           | Intense vs. Volume + L      | −10.880 | < 0.0001 | **** |
|    |           | Volume + L vs. Volume       | 6.474   | 0.0029   | **   |
|    | TEOSYAL®  | RHA® 1 vs. RHA® 3           | 4.604   | 0.0090   | **   |
|    |           | RHA® 2 vs. RHA® 3           | 5.270   | 0.0040   | **   |

|  |          |                   |        |        |     |
|--|----------|-------------------|--------|--------|-----|
|  |          | RHA® 3 vs. RHA® 4 | −5.766 | 0.0023 | **  |
|  |          | M vs. L           | 6.928  | 0.0008 | *** |
|  | STYLAGE® | L vs. XL          | −3.783 | 0.0442 | *   |
|  |          | L vs. XXL         | −6.828 | 0.0009 | *** |

<sup>1</sup> A statistical significance level described by one asterisk “\*” corresponded to a *p*-value between 0.01 and 0.05. A statistical significance level described by two asterisks “\*\*” corresponded to a *p*-value between 0.001 and 0.01. A statistical significance level described by three asterisks “\*\*\*” corresponded to a *p*-value between 0.0001 and 0.001. A statistical significance level described by four asterisks “\*\*\*\*” corresponded to a *p*-value inferior to 0.0001.

**Table S4.** Comparative analysis of manual injection pressures (i.e., two independent injectors) across different Merz Aesthetics BELOTERO® dermal filler products and injection techniques. Experiments were performed under clinical conditions, using SimSkin® cutaneous equivalents. PM, Patrick Micheels; TB, Thierry Bezzola.

| Products                        | Injection Location | Injection Technique                 | Needle Gauge (G) | Clinical Assessments and Recorded Pressure Values (N)                                                                          |
|---------------------------------|--------------------|-------------------------------------|------------------|--------------------------------------------------------------------------------------------------------------------------------|
| BELOTERO® Soft w/o lidocaine    | Dermis             | Point-by-point                      | 30G              | Low pressures, close to 1.00 N                                                                                                 |
| BELOTERO® Soft w/o lidocaine    | Dermis             | Retrograde tracing                  | 30G              | Low variability in injection curves, low pressures close to 1.00 N                                                             |
| BELOTERO® Soft w/o lidocaine    | Hypodermis         | Bolus                               | 30G              | Low pressures, close to 1.50 N. Variability noted in the injection curves                                                      |
| BELOTERO® Soft w/o lidocaine    | Hypodermis         | Retrograde tracing                  | 30G              | Low pressures, close to 1.50 N. Variability noted in the injection curves                                                      |
| BELOTERO® Soft w/ lidocaine     | Dermis             | Point-by-point                      | 30G              | Pressures are double those obtained with the lidocaine-free variant                                                            |
| BELOTERO® Soft w/ lidocaine     | Dermis             | Retrograde tracing                  | 30G              | Slight variability noted in the injection curves                                                                               |
| BELOTERO® Soft w/ lidocaine     | Hypodermis         | Bolus                               | 30G              | Pressures are higher than those obtained with the lidocaine-free variant, close to 3.90 N                                      |
| BELOTERO® Soft w/ lidocaine     | Hypodermis         | Retrograde tracing                  | 30G              | Pressures are higher than those obtained with the lidocaine-free variant, close to 3.90 N                                      |
| BELOTERO® Balance w/o lidocaine | Dermis             | Point-by-point & Retrograde tracing | 30G              | Pressures are 2.50 N for point-by-point injection and 1.98 N for retrograde tracing injection (homogeneous injection curves)   |
| BELOTERO® Balance w/o lidocaine | Hypodermis         | Bolus                               | 30G              | Low variability in injection curves, low pressures close to 1.50 N                                                             |
| BELOTERO® Balance w/o lidocaine | Hypodermis         | Retrograde tracing                  | 30G              | Pressures are 2.79 N with homogeneous injection curves                                                                         |
| BELOTERO® Balance w/ lidocaine  | Dermis             | Point-by-point                      | 30G              | Pressures are higher than those obtained with the lidocaine-free variant, close to 4.00 N, with homogeneous injection curves   |
| BELOTERO® Balance w/ lidocaine  | Dermis             | Retrograde tracing                  | 30G              | Pressures are higher than those obtained with the lidocaine-free variant, close to 3.00 N, with inhomogeneous injection curves |
| BELOTERO® Balance w/ lidocaine  | Hypodermis         | Bolus                               | 30G              | Pressures are higher than those obtained with the lidocaine-free variant, close to 4.00 N, with inhomogeneous injection curves |
| BELOTERO® Balance w/ lidocaine  | Hypodermis         | Retrograde tracing                  | 30G              | Pressures are higher than those obtained with the lidocaine-free variant, close to 4.00 N, with inhomogeneous injection curves |
| BELOTERO® Intense w/o lidocaine | Dermis             | Point-by-point                      | 27G              | Pressures are high, attaining 5.50 N, with inhomogeneous injection curves                                                      |
| BELOTERO® Intense w/o lidocaine | Dermis             | Retrograde tracing                  | 27G              | Pressures are high, attaining 5.30 N, with inhomogeneous injection curves                                                      |
| BELOTERO® Intense w/o lidocaine | Hypodermis         | Bolus                               | 27G              | Pressures are high, attaining 6.50 N, with inhomogeneous injection curves                                                      |

| Products                        | Injection Location | Injection Technique | Needle Gauge (G) | Clinical Assessments and Recorded Pressure Values (N)                                                |
|---------------------------------|--------------------|---------------------|------------------|------------------------------------------------------------------------------------------------------|
| BELOTERO® Intense w/o lidocaine | Hypodermis         | Retrograde tracing  | 27G              | Pressures are high, attaining 6.50 N, with inhomogeneous injection curves                            |
| BELOTERO® Intense w/ lidocaine  | Dermis             | Point-by-point      | 27G              | Pressures are moderate, attaining 3.60 N, with inhomogeneous injection curves                        |
| BELOTERO® Intense w/ lidocaine  | Dermis             | Retrograde tracing  | 27G              | Lower pressures than the lidocaine-free variant, with homogeneous injection curves                   |
| BELOTERO® Intense w/ lidocaine  | Hypodermis         | Bolus               | 27G              | Lower pressures than the lidocaine-free variant, with inhomogeneous injection curves                 |
| BELOTERO® Intense w/ lidocaine  | Hypodermis         | Retrograde tracing  | 27G              | Inhomogeneous injection curves                                                                       |
| BELOTERO® Volume w/o lidocaine  | Dermis             | Point-by-point      | 30G              | Low pressures, close to 2.00 N                                                                       |
| BELOTERO® Volume w/o lidocaine  | Dermis             | Retrograde tracing  | 30G              | Moderate pressures, close to 2.80 N, with inhomogeneous injection curves                             |
| BELOTERO® Volume w/o lidocaine  | Hypodermis         | Bolus               | 30G              | Moderate pressures, close to 3.00 N, with inhomogeneous injection curves                             |
| BELOTERO® Volume w/o lidocaine  | Hypodermis         | Retrograde tracing  | 30G              | Low pressures, with homogeneous injection curves                                                     |
| BELOTERO® Volume w/ lidocaine   | Dermis             | Point-by-point      | 30G              | Pressures are comparable to those of the lidocaine-free variant, with inhomogeneous injection curves |
| BELOTERO® Volume w/ lidocaine   | Dermis             | Retrograde tracing  | 30G              | Pressures are higher than those of the lidocaine-free variant, with inhomogeneous injection curves   |
| BELOTERO® Volume w/ lidocaine   | Hypodermis         | Bolus               | 30G              | Pressures are low, with inhomogeneous injection curves                                               |
| BELOTERO® Volume w/ lidocaine   | Hypodermis         | Retrograde tracing  | 30G              | Pressures are low, with inhomogeneous injection curves                                               |
| BELOTERO® Volume w/ lidocaine   | Hypodermis         | Bolus               | 27G              | Pressures are very low, under 1.00 N, with inhomogeneous injection curves                            |
| BELOTERO® Volume w/ lidocaine   | Hypodermis         | Retrograde tracing  | 27G              | Pressures are very low, under 1.00 N, with inhomogeneous injection curves                            |



**Table S5.** Comparative analysis of manual injection pressures across different Galderma Restylane® dermal filler products and injection techniques. Experiments were performed under clinical conditions, using SimSkin® cutaneous equivalents. L, lidocaine.

| Products            | Injection Location | Injection Technique        | Needle Gauge (G) | Clinical Assessments and Recorded Pressure Values (N)                                                                                     |
|---------------------|--------------------|----------------------------|------------------|-------------------------------------------------------------------------------------------------------------------------------------------|
| Restylane®          | Dermis             | Point-by-point             | 30G              | Similar pressure (close to 2.00 N)                                                                                                        |
| Restylane®          | Dermis             | Retrograde tracing         | 29G              | Lower pressure (close to 1.00 N)                                                                                                          |
| Restylane® + L      | Dermis             | Point-by-point             | 30G              | Higher pressure than w/o lidocaine                                                                                                        |
| Restylane® + L      | Dermis             | Retrograde tracing         | 30G              | Lower pressure than point-by-point, but higher than w/o lidocaine                                                                         |
| Restylane® Lyft     | Dermis             | Point-by-point             | 27G              | Extremely low pressure, higher than Restylane® w/o lidocaine                                                                              |
| Restylane® Lyft     | Dermis             | Retrograde tracing         | 27G              | Same as point-by-point                                                                                                                    |
| Restylane® Lyft + L | Dermis             | Point-by-point             | 27G              | Extremely low pressure, slightly higher than w/o lidocaine                                                                                |
| Restylane® Lyft + L | Dermis             | Retrograde tracing         | 27G              | Same as point-by-point, but less uniform curve than w/o lidocaine                                                                         |
| Restylane®          | Hypodermis         | Bolus & Retrograde tracing | 29G              | Low pressure (around 1.50 N)                                                                                                              |
| Restylane®          | Hypodermis         | Bolus & Retrograde tracing | 30G              | Slightly higher pressure (around 2.90 N)                                                                                                  |
| Restylane® + L      | Hypodermis         | Bolus & Retrograde tracing | 29G              | Slightly higher pressure than w/o lidocaine (around 2.97 N)                                                                               |
| Restylane® + L      | Hypodermis         | Bolus & Retrograde tracing | 30G              | Higher pressure for bolus (around 4.50 N) and less uniform curve than 29 G, but stable and uniform for retrograde tracing (around 2.80 N) |
| Restylane® Lyft     | Hypodermis         | Bolus & Retrograde tracing | 27G              | Extremely low pressure (less than 1.00 N)                                                                                                 |
| Restylane® Lyft + L | Hypodermis         | Bolus & Retrograde tracing | 27G              | Slightly higher pressure than w/o lidocaine and less uniform curve for retrograde tracing                                                 |

**Table S6.** Comparative analysis of manual injection pressures (i.e., two independent injectors) across different VIVACY STYLAGE® dermal filler products and injection techniques. Experiments were performed under clinical conditions, using SimSkin® cutaneous equivalents. NA, non-applicable; PM, Patrick Micheels; TB, Thierry Bezzola.

| Products     | Injection Location | Injection Technique | Needle Gauge (G) | Clinical Assessments and Recorded Pressure Values (N)                                                                                              |
|--------------|--------------------|---------------------|------------------|----------------------------------------------------------------------------------------------------------------------------------------------------|
| STYLAGE® S   | Dermis             | Point-by-point      | 30G              | 3.00 N (Very stable, with minimal variations)                                                                                                      |
| STYLAGE® S   | Dermis             | Retrograde tracing  | 30G              | 3.00 N (Very stable, with very low amplitude variations)                                                                                           |
| STYLAGE® M   | Dermis             | Point-by-point      | 30G              | 1.80 N                                                                                                                                             |
| STYLAGE® M   | Dermis             | Retrograde tracing  | 30G              | 3.70 N (Small fluctuations throughout the injection, with low amplitude variations)                                                                |
| STYLAGE® L   | Dermis             | Point-by-point      | 27G              | 2.00 N                                                                                                                                             |
| STYLAGE® L   | Dermis             | Retrograde tracing  | 27G              | 2.30 N (Very stable, with very low amplitude variations)                                                                                           |
| STYLAGE® XL  | Dermis             | Point-by-point      | 27G              | 7.00 N                                                                                                                                             |
| STYLAGE® XL  | Dermis             | Retrograde tracing  | 27G              | 2.80–4.00 N                                                                                                                                        |
| STYLAGE® XXL | Dermis             | Point-by-point      | 27G              | 2.80–3.50 N                                                                                                                                        |
| STYLAGE® XXL | Dermis             | Retrograde tracing  | 27G              | 2.70 N                                                                                                                                             |
| STYLAGE® S   | Hypodermis         | Bolus injection     | 30G              | 3.80 N                                                                                                                                             |
| STYLAGE® S   | Hypodermis         | Retrograde tracing  | 30G              | Very stable, with very low amplitude variations                                                                                                    |
| STYLAGE® M   | Hypodermis         | Bolus injection     | 30G              | One injector has ascending curves with very low pressure fluctuations, the other injector is stable from start with very low pressure fluctuations |
| STYLAGE® M   | Hypodermis         | Retrograde tracing  | 30G              | Very low pressure fluctuations for one injector, higher for the other with very stable curve                                                       |
| STYLAGE® L   | Hypodermis         | Bolus injection     | 27G              | Ascending curves, with very low pressure fluctuations                                                                                              |
| STYLAGE® L   | Hypodermis         | Retrograde tracing  | 27G              | Slightly ascending curves, with very low amplitude fluctuations                                                                                    |
| STYLAGE® XL  | Hypodermis         | Bolus injection     | 27G              | Slightly ascending curves, with some more pronounced pressure fluctuations for both injectors                                                      |

**Table S7.** Comparative analysis of manual injection pressures (i.e., two independent injectors) across different TEOXANE TEOSYAL RHA® and Ultra Deep dermal filler products and injection techniques. Experiments were performed under clinical conditions, using SimSkin® cutaneous equivalents. NA, non-applicable; PM, Patrick Micheels; TB, Thierry Bezzola.

| Products           | Injection Location | Injection Technique                                    | Needle Gauge (G) | Clinical Assessments and Recorded Pressure Values (N) |
|--------------------|--------------------|--------------------------------------------------------|------------------|-------------------------------------------------------|
| TEOSYAL RHA® 1     | Dermis             | Point-by-point                                         | 30G              | PM: < 1.00 N<br>TB: 3.00 N                            |
| TEOSYAL RHA® 1     | Dermis             | Retrograde tracing                                     | 30G              | PM: 0.80 N<br>TB: 2.90 N                              |
| TEOSYAL RHA® 2     | Dermis             | Point-by-point                                         | 30G              | PM: 1.50 N<br>TB: 3.00 N                              |
| TEOSYAL RHA® 2     | Dermis             | Retrograde tracing                                     | 30G              | 1.80 N                                                |
| TEOSYAL RHA® 3     | Dermis             | Point-by-point                                         | 27G              | 1.50 N                                                |
| TEOSYAL RHA® 3     | Dermis             | Retrograde tracing                                     | 27G              | PM: 0.58 N<br>TB: 1.50 N                              |
| TEOSYAL RHA® 4     | Dermis             | Point-by-point                                         | 27G              | PM: < 0.40 N<br>TB: 0.80 N                            |
| TEOSYAL RHA® 4     | Dermis             | Retrograde tracing                                     | 27G              | PM: < 0.40 N<br>TB: 0.80 N                            |
| TEOSYAL RHA® 1     | Hypodermis         | Bolus                                                  | 30G              | PM: < 1.00 N                                          |
| TEOSYAL RHA® 1     | Hypodermis         | Retrograde tracing                                     | 30G              | PM: Slightly higher than bolus                        |
| TEOSYAL RHA® 2     | Hypodermis         | Bolus                                                  | 30G              | 3.40 N                                                |
| TEOSYAL RHA® 2     | Hypodermis         | Retrograde tracing                                     | 30G              | 3.40 N                                                |
| TEOSYAL RHA® 3     | Hypodermis         | Bolus                                                  | 27G              | 1.60 N                                                |
| TEOSYAL RHA® 3     | Hypodermis         | Retrograde tracing                                     | 27G              | 1.50 N                                                |
| TEOSYAL RHA® 4     | Hypodermis         | Bolus                                                  | 27G              | 0.60 N                                                |
| TEOSYAL RHA® 4     | Hypodermis         | Retrograde tracing                                     | 27G              | Very low pressure, very low amplitude variation       |
| TEOSYAL Ultra Deep | Dermis             | This gel is not indicated to be injected superficially | 25G              | NA                                                    |
| TEOSYAL Ultra Deep | Hypodermis         | Bolus                                                  | 25G              | 1.20 N                                                |
| TEOSYAL Ultra Deep | Hypodermis         | Retrograde tracing                                     | 25G              | 3.00 N                                                |

**Table S8.** Comparative analysis of manual injection pressures (i.e., two independent injectors) across different Allergan Aesthetics JUVÉDERM® dermal filler products and injection techniques. Experiments were performed under clinical conditions, using SimSkin® cutaneous equivalents. PM, Patrick Micheels; TB, Thierry Bezzola.

| Product            | Injection Location | Injection Technique | Needle Gauge (G) | Clinical Assessments and Recorded Pressure Values (N) |
|--------------------|--------------------|---------------------|------------------|-------------------------------------------------------|
| JUVÉDERM® Ultra 2  | Dermis             | Point-by-point      | 30G              | PM: 0.50 N<br>TB: 2.80 N                              |
| JUVÉDERM® Ultra 2  | Dermis             | Retrograde tracing  | 30G              | PM: 0.55 N<br>TB: 3.50 N                              |
| JUVÉDERM® Ultra 3  | Dermis             | Point-by-point      | 27G              | PM: 2.50 N (1.75–3.60 N)<br>TB: 7.00 N                |
| JUVÉDERM® Ultra 3  | Dermis             | Retrograde tracing  | 27G              | PM: 3.00 N (beginning) – 1.50 N (end)<br>TB: 7.20 N   |
| JUVÉDERM® Ultra 2  | Hypodermis         | Bolus               | 30G              | PM: peak at 1.20 N<br>TB: peak at 5.20 N              |
| JUVÉDERM® Ultra 2  | Hypodermis         | Retrograde tracing  | 30G              | PM: 0.90 N<br>TB: 4.50 N                              |
| JUVÉDERM® Ultra 3  | Hypodermis         | Bolus               | 27G              | PM: peak at 6.85 N<br>TB: peak at 3.61 N              |
| JUVÉDERM® Ultra 3  | Hypodermis         | Retrograde tracing  | 27G              | PM: 5.58 N<br>TB: decreasing from 3.59 N to 1.80 N    |
| JUVÉDERM® Volbella | Dermis             | Retrograde tracing  | 30G              | PM: 0.90 N<br>TB: range of 1.50–1.86 N                |

**Table S9.** Quantitative results of the post hoc Tukey's multiple comparison test, in relation with the comparative automated injectability data presented in Figure 4 and Figure 5. Each dermal filler product was statistically compared to all the other products of the same brand. Non-significant differences (i.e., corresponding to a  $p$ -value  $> 0.05$ ) were not listed. G, gauge; L, lidocaine.

| Product Brands | Compared Products        | Mean Absolute Difference (N) | Adjusted $p$ -Value | Statistical Significance Level <sup>1</sup> |
|----------------|--------------------------|------------------------------|---------------------|---------------------------------------------|
| JUVÉDERM®      | VOLIFT® vs. Ultra 2      | −17.070                      | < 0.0001            | ****                                        |
|                | VOLUX® vs. Ultra 2       | −17.770                      | < 0.0001            | ****                                        |
|                | VOLBELLA® vs. VOLUMA®    | −11.520                      | 0.0022              | **                                          |
|                | VOLBELLA® vs. Ultra 3    | −9.715                       | 0.0085              | **                                          |
|                | VOLBELLA® vs. Ultra 2    | −23.030                      | < 0.0001            | ****                                        |
|                | VOLUMA® vs. Ultra 2      | −11.510                      | 0.0023              | **                                          |
|                | Ultra 3 vs. Ultra 2      | −13.320                      | 0.0006              | ***                                         |
| Restylane®     | Lyft vs. Lyft + L        | −11.620                      | < 0.0001            | ****                                        |
|                | Lyft vs. 29G             | −4.294                       | 0.0165              | *                                           |
|                | Lyft vs. 29G + L         | −17.470                      | < 0.0001            | ****                                        |
|                | Lyft vs. 30G             | −8.548                       | < 0.0001            | ****                                        |
|                | Lyft vs. 30G + L         | −14.750                      | < 0.0001            | ****                                        |
|                | Lyft + L vs. 29G         | 7.322                        | 0.0002              | ***                                         |
|                | Lyft + L vs. 29G + L     | −5.855                       | 0.0015              | **                                          |
|                | 29G vs. 29G + L          | −13.180                      | < 0.0001            | ****                                        |
|                | 29G vs. 30G              | −4.254                       | 0.0175              | *                                           |
|                | 29G vs. 30G + L          | −10.450                      | < 0.0001            | ****                                        |
|                | 29G + L vs. 30G          | 8.923                        | < 0.0001            | ****                                        |
|                | 30G vs. 30G + L          | −6.198                       | 0.0009              | ***                                         |
| BELOTERO®      | Soft vs. Balance         | −9.882                       | 0.0317              | *                                           |
|                | Soft vs. Balance + L     | −26.640                      | < 0.0001            | ****                                        |
|                | Soft vs. Intense         | −21.920                      | < 0.0001            | ****                                        |
|                | Soft vs. Intense + L     | −19.280                      | < 0.0001            | ****                                        |
|                | Soft vs. Volume          | −16.630                      | 0.0003              | ***                                         |
|                | Soft vs. Volume + L      | −22.000                      | < 0.0001            | ****                                        |
|                | Soft + L vs. Balance     | −10.230                      | 0.0247              | *                                           |
|                | Soft + L vs. Balance + L | −26.990                      | < 0.0001            | ****                                        |
|                | Soft + L vs. Intense     | −22.270                      | < 0.0001            | ****                                        |
|                | Soft + L vs. Intense + L | −19.620                      | < 0.0001            | ****                                        |
|                | Soft + L vs. Volume      | −16.980                      | 0.0002              | ***                                         |
|                | Soft + L vs. Volume + L  | −22.350                      | < 0.0001            | ****                                        |
|                | Balance vs. Balance + L  | −16.760                      | 0.0002              | ***                                         |
|                | Balance vs. Intense      | −12.040                      | 0.0066              | **                                          |
|                | Balance vs. Intense + L  | −9.3940                      | 0.0448              | *                                           |
|                | Balance vs. Volume + L   | −12.120                      | 0.0062              | **                                          |
|                | Balance + L vs. Volume   | 10.010                       | 0.0289              | *                                           |
| TEOSYAL®       | RHA 1 vs. RHA 2          | −10.230                      | 0.0098              | **                                          |
|                | RHA 1 vs. RHA 4          | 12.720                       | 0.0018              | **                                          |
|                | RHA 1 vs. Ultra deep     | −19.280                      | < 0.0001            | ****                                        |
|                | RHA 2 vs. RHA 3          | 15.330                       | 0.0003              | ***                                         |
|                | RHA 2 vs. RHA 4          | 22.950                       | < 0.0001            | ****                                        |
|                | RHA 2 vs. Ultra deep     | −9.053                       | 0.0227              | *                                           |
|                | RHA 3 vs. Ultra deep     | −24.390                      | < 0.0001            | ****                                        |
|                | RHA 4 vs. Ultra deep     | −32.000                      | < 0.0001            | ****                                        |
| STYLAGE®       | S vs. XL                 | −12.060                      | 0.0063              | **                                          |
|                | S vs. XXL                | −18.150                      | 0.0003              | ***                                         |

|  |           |         |        |    |
|--|-----------|---------|--------|----|
|  | M vs. XXL | -14.300 | 0.0018 | ** |
|  | L vs. XXL | -10.350 | 0.0169 | *  |

<sup>1</sup> A statistical significance level described by one asterisk “\*” corresponded to a  $p$ -value between 0.01 and 0.05. A statistical significance level described by two asterisks “\*\*” corresponded to a  $p$ -value between 0.001 and 0.01. A statistical significance level described by three asterisks “\*\*\*” corresponded to a  $p$ -value between 0.0001 and 0.001. A statistical significance level described by four asterisks “\*\*\*\*” corresponded to a  $p$ -value inferior to 0.0001.



**Table S10.** Quantitative results of the post hoc Tukey's multiple comparison test, in relation with the sterilization study presented in Figure S7. Pa, Pascals.

| Compared Groups                  | Mean Absolute Difference (Pa) | Adjusted <i>p</i> -Value | Statistical Significance Level <sup>1</sup> |
|----------------------------------|-------------------------------|--------------------------|---------------------------------------------|
| $G'$ (HA) vs. $G''$ (HA)         | 353.4                         | < 0.0001                 | ****                                        |
| $G'$ (HA) vs. $G'$ (HA + L)      | 161.4                         | < 0.0001                 | ****                                        |
| $G'$ (HA) vs. $G''$ (HA + L)     | 365.1                         | < 0.0001                 | ****                                        |
| $G''$ (HA) vs. $G'$ (HA + L)     | −192.1                        | < 0.0001                 | ****                                        |
| $G''$ (HA) vs. $G''$ (HA + L)    | 11.63                         | < 0.0001                 | ****                                        |
| $G'$ (HA + L) vs. $G''$ (HA + L) | 203.7                         | < 0.0001                 | ****                                        |

<sup>1</sup> A statistical significance level described by four asterisks "\*\*\*\*" corresponded to a *p*-value inferior to 0.0001.
